# Supplementary material for: Upgraded global mapping information for earth system modelling: anapplication to surface water depth at ECMWF
Source: Copernicus journal article supplement (doi:10.5194/hess-2019-234), 2019-05-24
Supplement: Supplementary file [file hess-2019-234-RC2-supplement.pdf]

Upgraded global mapping information for earth system modelling: an application to surface water depth at ECMWF

For the editor and authors.

The reviewer is completely satisfied with the authors ' response to the reviewer's comments. The manuscript can be published in its current form.
